# Supplementary material for: Source Apportionment of Carbonaceous Aerosols in Beijing withRadiocarbon and Organic Tracers: Insight into the Differencesbetween Urban and Rural Sites
Source: Copernicus journal article supplement (doi:10.5194/acp-2020-1018), 2020-11-19
Supplement: Supplementary file 1 [file acp-2020-1018-supplement.pdf]

1 **Supplement of**

2 **Source Apportionment of Carbonaceous Aerosols in Beijing with Radiocarbon**  
3 **and Organic Tracers: Insight into the Differences between Urban and Rural Sites**

4 **Siqi Hou et al.**

5 *Correspondence to:* Roy M. Harrison (r.m.harrison@bham.ac.uk), Zongbo Shi (z.shi@bham.ac.uk)

6

## 7 **Influence from Regional Transport**

8 During the wintertime, air masses transported to Beijing were mainly from Inner Mongolia, Shanxi  
9 and Hebei, where the open burning activities were associated with maize straw (Zhang et al., 2019).  
10 During summer, air masses from Shandong, Hebei, Liaoning and Tianjin may bring particles from  
11 burning of wheat straw. However, for Inner Mongolia and Shanxi, little wheat is grown in these areas  
12 (Zhang et al., 2019; Zhou et al., 2017) and the influence of wheat straw burning is less important. The  
13 fire spot intensity, transport direction and sources of biomass burning are summarized in Table S1.

14 The high fire spot intensity indicates a strong likelihood of regional transport. However, the  
15 concentrations of LG would decrease with atmospheric transport by aging, varying with  
16 environmental conditions (Bhattarai et al., 2019), which can be used to infer the influence from  
17 regional transport and local emissions. For example, with similar  $PM_{2.5}$  concentrations, the LG  
18 concentration on 26 November was much lower than that on 3 December. Considering the different  
19 intensity of fire spots between the two days, LG on 26 November may arise more from regional  
20 transport instead of local emissions. Moreover, the LG concentration on 2 December was similar to  
21 that on 3 December, but the  $PM_{2.5}$  concentration was much lower. This implies a contribution from  
22 local sources in addition to regional transport on 2 December.

## 23 **Detailed Method of Ratio Selection and Sensitivity Test for Quantification of Biomass Burning**

24 As mentioned in the main text, softwood, maize straw and wheat straw are the main types of biomass  
25 fuels used within the region. The ratios of EC/OC and OC/LG from softwood, maize straw and wheat  
26 straw are summarized in Table S2.

27 As the fraction of LG from wood burning ( $f_{wood}$ ) and straw burning ( $f_{straw} = 1 - f_{wood}$ ) are each in the  
28 range of 0 to 1, only those matching this limitation were selected when calculating  $OC_{bb}$ . Emission  
29 factors of LG from various biofuels showed that the LG emission from wheat straw was hundreds of  
30 times higher than from the values for wood combustion, while the emission factors are similar  
31 between maize and wood (Yan et al., 2018). It means that although the consumption of wheat straw  
32 may be less than that of wood, LG emission from wheat straw may exceed that from wood, and  $f_{wood}$

may be quite small in summer. Besides, the sum of calculated  $OC_{\text{straw}}$  and  $OC_{\text{wood}}$  should not exceed the measured  $OC_{\text{nf}}$  concentrations, which is another limitation for selecting EC/OC and OC/LG ratios. Hence, ratios of softwood from No. 25 to No. 37 in Table S3 with ratios of maize (No. 48 in Table S3) were used for the wintertime, and No. 30-37 with No. 42-45, 50 from softwood and wheat straw respectively were used in the summertime estimation of  $f_{\text{wood}}$

$OC_{\text{bb}}$  from each type of softwood and crop straw combination can be estimated once  $f_{\text{wood}}$  was confirmed, and then these were averaged. To further assess the sensitivity of the calculated  $OC_{\text{bb}}$  results to the different ratio sets, concentrations of  $OC_{\text{bb}}$  for each set of ratios have been plotted vs. the averaged values (Fig. S4). Compared to  $OC_{\text{wood}}$ , concentrations of  $OC_{\text{straw}}$  show a small spread, and are in narrow ranges. It means the  $OC_{\text{straw}}$  are less affected by the varying ratios, as the range of ratios is smaller. According to Fig. S4, there are large uncertainties attached to the estimated values of  $OC_{\text{wood}}$ , but not  $OC_{\text{straw}}$ . The uncertainties from  $OC_{\text{bb}}$  can further affect the estimation of OC from cooking, but have no influence on estimates of SOC, which are determined from the  $(OC/EC)_{\text{min}}$  ratios. The accuracy of this extended Gelencsér method would increase if the softwood types and ratios were confirmed.

The concentrations and contributions of  $OC_{\text{bb}}$  are shown in Fig. S5. The uncertainties of  $OC_{\text{bb}}$  are calculated considering the uncertainties of  $EC_{\text{nf}}$  and LG:

$$u(OC_{\text{bb}}) = \sqrt{\sum \left[ \left( \frac{a-b}{ac-bd} \right)^2 u(EC_{\text{nf}})^2 + \left( \frac{abc-abd}{ac-bd} \right)^2 u(LG)^2 \right]}$$

where  $a = (OC/LG)_{\text{wood}}$ ,  $b = (OC/LG)_{\text{straw}}$ ,  $c = (EC/OC)_{\text{wood}}$ , and  $d = (EC/OC)_{\text{straw}}$ .

The average uncertainty of the LG concentration is 15%. The uncertainty of  $EC_{\text{nf}}$  is calculated by combining all the uncertainties from EC concentrations,  $f_{\text{NF}}$ ,  $f_{\text{M}}$  and  $f_{\text{ref}}$ . The average uncertainty of  $OC_{\text{bb}}$  is 48.6%.

#### **Determination of $OC/EC_{\text{f, min}}$ and $OC/EC_{\text{nf, min}}$ ratios and the estimation of $POC_{\text{f}}$ and $POC_{\text{nf}}$**

OC/EC ratios are seen as an indicator of aerosol emission sources to estimate the POC and SOC concentrations.  $^{14}\text{C}$  analysis can provide OC to EC ratios from fossil and non-fossil sources ( $\text{OC}/\text{EC}_\text{f}$  and  $\text{OC}/\text{EC}_\text{nf}$ ). Herein, we use the lowest  $\text{OC}/\text{EC}_\text{f}$  and  $\text{OC}/\text{EC}_\text{nf}$  ratios ( $\text{OC}/\text{EC}_\text{f, min}$  and  $\text{OC}/\text{EC}_\text{nf, min}$ , respectively) to represent primary OC/EC emission ratio to calculate primary fossil-derived and non-fossil-derived OC ( $\text{POC}_\text{f}$  and  $\text{POC}_\text{nf}$ ) respectively. To avoid the overestimation of  $\text{POC}_\text{f}$  and  $\text{POC}_\text{nf}$  from the measured  $\text{OC}/\text{EC}_\text{f, min}$  and  $\text{OC}/\text{EC}_\text{nf, min}$  due to the limited samples for  $^{14}\text{C}$  analysis in this study, it is necessary to evaluate  $\text{OC}/\text{EC}_\text{nf, min}$  and  $\text{OC}/\text{EC}_\text{f, min}$  ratios for the whole sampling period.

The relationship of  $\text{OC}/\text{EC}_\text{nf}$  and  $\text{OC}/\text{EC}_\text{f}$  with  $\text{OC}/\text{EC}$  can be described as follow,

$$\frac{\text{OC}}{\text{EC}_\text{nf}} = \frac{f_{\text{NF,OC}}}{f_{\text{NF,EC}}} \times \frac{\text{OC}}{\text{EC}}$$

$$\frac{\text{OC}}{\text{EC}_\text{f}} = \left( \frac{1-f_{\text{NF,OC}}}{1-f_{\text{NF,EC}}} \right) \times \frac{\text{OC}}{\text{EC}}$$

where  $f_{\text{NF, OC}}$  and  $f_{\text{NF, EC}}$  are the non-fossil fractions of OC and EC,  $(1-f_{\text{NF, OC}})$  and  $(1-f_{\text{NF, EC}})$  are the fossil fractions of OC and EC.

Ratios of  $\text{OC}/\text{EC}_\text{nf}$  are determined by  $\frac{f_{\text{NF,OC}}}{f_{\text{NF,EC}}}$  and  $\text{OC}/\text{EC}$ , therefore  $\text{OC}/\text{EC}_\text{nf, min}$  can be roughly quantified by multiplying the lowest 5%  $\text{OC}/\text{EC}$  ratios with the lowest two  $\frac{f_{\text{NF,OC}}}{f_{\text{NF,EC}}}$  ratios. Similarly,  $\text{OC}/\text{EC}_\text{f, min}$  can be estimated by multiplying the lowest 5%  $\text{OC}/\text{EC}$  ratios with the lowest two  $\left( \frac{1-f_{\text{NF,OC}}}{1-f_{\text{NF,EC}}} \right)$  ratios. The estimated  $\text{OC}/\text{EC}_\text{nf, min}$  and  $\text{OC}/\text{EC}_\text{f, min}$  ratios for IAP and PG sites in winter and summer sampling period were listed in Table S4. The estimated  $\text{OC}/\text{EC}_\text{nf, min}$  and  $\text{OC}/\text{EC}_\text{f, min}$  ratios are within the values of OC/EC emission ratios from coal combustion (1.5-15), traffic emission (0.69-1.01), and biomass burning (3-7) (Ni et al., 2018). Higher  $\text{OC}/\text{EC}_\text{f, min}$  ratios in winter are consistent with the fact of elevated coal combustion compared to traffic emissions. It indicated the evaluation of  $\text{OC}/\text{EC}_\text{nf, min}$  and  $\text{OC}/\text{EC}_\text{f, min}$  ratios are reasonable.

77

## 78    **References**

- 79    Bhattarai, H., Saikawa, E., Wan, X., Zhu, H., Ram, K., Gao, S., Kang, S., Zhang, Q., Zhang, Y., Wu,  
80    G., Wang, X., Kawamura, K., Fu, P., and Cong, Z.:    Levoglucosan as a tracer of biomass burning:  
81    Recent progress and perspectives, *Atmos. Res.*, 220, <https://doi.org/10.1016/j.atmosres.2019.01.004>  
82    20-33, 2019.
- 83    Dhammapala, R., Claiborn, C., Jimenez, J., Corkill, J., Gullett, B., Simpson, C., and Paulsen, M.:  
84    Emission factors of PAHs, methoxyphenols, levoglucosan, elemental carbon and organic carbon from  
85    simulated wheat and Kentucky bluegrass stubble burns, *Atmos. Environ.*, 41, 2660-2669,  
86    <https://doi.org/10.1016/j.atmosenv.2006.11.023>, 2007.
- 87    Fine, P. M., Cass, G. R., and Simoneit, B. R. T.:    Chemical characterization of fine particle emissions  
88    from fireplace combustion of woods grown in the northeastern United States, *Environ. Sci. Technol.*,  
89    35, 2665-2675, <https://doi.org/10.1021/es001466k>, 2001.
- 90    Fine, P. M., Cass, G. R. and Simoneit, B. R. T.:    Chemical characterization of fine particle emissions  
91    from the fireplace combustion of woods grown in the southern United States, *Environ. Sci. Technol.*,  
92    36, 1442-1451, <https://doi.org/10.1021/es0108988>, 2002.
- 93    Fine, P. M., Cass, G. R., and Simoneit, B. R. T.:    Chemical characterization of fine particle emissions  
94    from the wood stove combustion of prevalent United States tree species, *Environ. Eng. Sci.*, 21, 705-  
95    721, <https://doi.org/10.1089/ees.2004.21.705>, 2004.
- 96    Fushimi, A., Saitoh, K., Hayashi, K., Ono, K., Fujitani, Y., Villalobos, A. M., Shelton, B. R., Takami,  
97    A., Tanabe, K. & Schauer, J. J.:    Chemical characterization and oxidative potential of particles  
98    emitted from open burning of cereal straws and rice husk under flaming and smoldering conditions,  
99    *Atmos. Environ.*, 163, 118-127, <https://doi.org/10.1016/j.atmosenv.2017.05.037>, 2017.
- 100    Gonçalves, C., Alves, C., Evtyugina, M., Mirante, F., Pio, C., Caseiro, A., Schmidl, C., Bauer, H.,  
101    and Carvalho, F.:    Characterisation of PM<sub>10</sub> emissions from woodstove combustion of common  
102    woods    grown    in    Portugal,    *Atmos.    Environ.*,    44,    4474-4480,  
103    <https://doi.org/10.1016/j.atmosenv.2010.07.026>, 2010.
- 104    Hays, M. D., Geron, C. D., Linna, K. J., Smith, N. D., and Schauer, J. J.:    Speciation of gas-phase  
105    and fine particle emissions from burning of foliar fuels, *Environ. Sci. Technol.*, 36, 2281-2295,  
106    <https://doi.org/10.1021/es0111683>, 2002.
- 107    Hays, M. D., Fine, P. M., Geron, C. D., Kleeman, M. J., and Gullett, B. K.:    Open burning of  
108    agricultural biomass: Physical and chemical properties of particle-phase emissions, *Atmos. Environ.*,  
109    39, 6747-6764, <https://doi.org/10.1016/j.atmosenv.2005.07.072>, 2005.
- 110    Mazzoleni, L. R., Zielinska, B., and Moosmüller, H.:    Emissions of levoglucosan, methoxy phenols,  
111    and organic acids from prescribed burns, laboratory combustion of wildland fuels, and residential  
112    wood combustion, *Environ. Sci. Technol.*, 41, 2115-2122, <https://doi.org/10.1021/es061702c>, 2007.

113 Ni, H. Y., Huang, R.-J., Cao, J. J., Liu, W. G., Zhang, T., Wang, M., Meijer, H. A. J., and Dusek, U.:  
 114 Source apportionment of carbonaceous aerosols in Xi'an, China: insights from a full year of  
 115 measurements of radiocarbon and the stable isotope  $^{13}\text{C}$ , *Atmos. Chem. Phys.*, 18, 16363-16383,  
 116 <https://doi.org/10.5194/acp-18-16363-2018>, 2018.

117 Sang-Arlt, X., Fu, H. X., Zhang, Y. A., Ding, X., Wang, X. M., Zhou, Y. N., Zou, L. L., Zellmer, G.  
 118 F., and Engling, G.: Carbonaceous aerosol emitted from biofuel household stove combustion in  
 119 South China, *Atmosphere*, 11, 112, <https://doi.org/10.3390/atmos11010112>, 2020.

120 Schauer, J. J., Kleeman, M. J., Cass, G. R., and Simoneit, B. R. T.: Measurement of emissions from  
 121 air pollution sources. 3.  $\text{C}_1\text{-C}_{29}$  organic compounds from fireplace combustion of wood, *Environ. Sci.*  
 122 *Technol.*, 35, 1716-1728, <https://doi.org/10.1021/es001331e>, 2001.

123 Schmidl, C., Bauer, H., Dattler, A., Hitzenberger, R., Weissenboeck, G., Marr, I. L., and Puxbaum,  
 124 H.: Chemical characterisation of particle emissions from burning leaves, *Atmos. Environ.*, 42,  
 125 9070-9079, <https://doi.org/10.1016/j.atmosenv.2008.09.010>, 2008a.

126 Schmidl, C., Marr, L. L., Caseiro, A., Kotianová, P., Berner, A., Bauer, H., Kasper-Giebl, A., and  
 127 Puxbaum, H.: Chemical characterisation of fine particle emissions from wood stove combustion of  
 128 common woods growing in mid-European Alpine regions, *Atmos. Environ.*, 42, 126-141,  
 129 <https://doi.org/10.1016/j.atmosenv.2007.09.028>, 2008b.

130 Sun, J., Shen, Z. X., Zhang, Y., Zhang, Q., Lei, Y. L., Huang, Y., Niu, X. Y., Xu, H. M., Cao, J. J.,  
 131 Ho, S. S. H., and Li, X. X.: Characterization of  $\text{PM}_{2.5}$  source profiles from typical biomass burning  
 132 of maize straw, wheat straw, wood branch, and their processed products (briquette and charcoal) in  
 133 China, *Atmos. Environ.*, 205, 36-45, <https://doi.org/10.1016/j.atmosenv.2019.02.038>, 2019.

134 Wang, Z., Bi, X., Sheng, G., and Fu, J.: Characterization of organic compounds and molecular  
 135 tracers from biomass burning smoke in South China I: Broad-leaf trees and shrubs, *Atmos. Environ.*,  
 136 43, 3096-3102, <https://doi.org/10.1016/j.atmosenv.2009.03.012>, 2009.

137 Yan, C., Zheng, M., Sullivan, A. P., Shen, G., Chen, Y., Wang, S., Zhao, B., Cai, S., Desyaterik, Y.,  
 138 Li, X., Zhou, T., Gustafsson, Ö., and Collett, Jr. J. L.: Residential coal combustion as a source of  
 139 levoglucosan in China, *Environ. Sci. Technol.*, 52, 1665-1674,  
 140 <https://doi.org/10.1021/acs.est.7b05858>, 2018.

141 Zhang, X., Lu, Y., Wang, Q. G., and Qian, X.: A high-resolution inventory of air pollutant  
 142 emissions from crop residue burning in China, *Atmos. Environ.*, 213, 207-214,  
 143 <https://doi.org/10.1016/j.atmosenv.2019.06.009>, 2019.

144 Zhang, Y.-X., Shao, M., Zhang, Y.-H., Zeng, L.-M., He, L.-Y., Zhu, B., Wei, Y.-J., and Zhu, X.-L.:  
 145 Source profiles of particulate organic matters emitted from cereal straw burnings, *J. Environ. Sci.*,  
 146 19, 167-175, [https://doi.org/10.1016/S1001-0742\(07\)60027-8](https://doi.org/10.1016/S1001-0742(07)60027-8), 2007.

147 Zhou, Y., Xing, X., Lang, J., Chen, D., Cheng, S., Wei, L., Wei, X., and Liu, C.: A comprehensive  
 148 biomass burning emission inventory with high spatial and temporal resolution in China, *Atmos.*  
 149 *Chem. Phys.*, 17, 2839-2864, <https://doi.org/10.5194/acp-17-2839-2017>, 2017.

150 **Table S1.** Average concentrations of PM<sub>2.5</sub>, EC, OC, fossil and non-fossil fractions of EC and OC  
151 on <sup>14</sup>C sampling period.

|                                         | Winter                                  |                        |                                         |                       | Summer                                   |                                    |
|-----------------------------------------|-----------------------------------------|------------------------|-----------------------------------------|-----------------------|------------------------------------------|------------------------------------|
|                                         | IAP haze<br>(n=5)                       | IAP non-<br>haze (n=2) | PG haze<br>(n=5)                        | PG non-<br>haze (n=2) | IAP (n=6)                                | PG (n=5)                           |
|                                         | 11/24, 11/26,<br>12/02, 12/03,<br>12/04 | 11/22, 12/01           | 11/24, 11/26,<br>12/02, 12/03,<br>12/04 | 11/22, 12/01          | 5/24, 5/26,<br>5/27, 6/10,<br>6/16, 6/17 | 5/26, 5/27,<br>6/10, 6/16,<br>6/17 |
| PM <sub>2.5</sub> (μg m <sup>-3</sup> ) | 158.7±62.1                              | 30.1±27.3              | 212.1±84.9                              | 28.9±17.1             | 42.5±26.5                                | 42.7±21.2                          |
| EC (μg m <sup>-3</sup> )                | 4.8±1.3                                 | 1.2±1.4                | 6.7±1.6                                 | 2.0±0.5               | 1.1±0.3                                  | 2.0±0.7                            |
| f <sub>NF, EC</sub>                     | 0.32±0.03                               | 0.45±0.07              | 0.39±0.07                               | 0.52±0.00             | 0.46±0.09                                | 0.41±0.10                          |
| OC (μg m <sup>-3</sup> )                | 33.8±8.6                                | 9.4±7.4                | 62.0±19.4                               | 16.4±6.1              | 8.3±3.2                                  | 11.5±4.9                           |
| f <sub>NF, OC</sub>                     | 0.32±0.05                               | 0.32±0.03              | 0.40±0.07                               | 0.42±0.02             | 0.46±0.12                                | 0.50±0.09                          |

152 f<sub>NF, EC</sub> and f<sub>NF, OC</sub> are the non-fossil fractions of EC and OC.

153

**Table S2.** Summary of fire spot intensity, transport direction and sources of biomass burning.

| Site | Date       | PM <sub>2.5</sub><br>μg m <sup>-3</sup> | EC <sub>nf</sub><br>μg m <sup>-3</sup> | LG<br>ng m <sup>-3</sup> | Fire spots<br>intensity | Transport       | Sources of biomass<br>burning |
|------|------------|-----------------------------------------|----------------------------------------|--------------------------|-------------------------|-----------------|-------------------------------|
| IAP  | 2016/11/22 | 10.9                                    | 0.14                                   | 96.1                     | Low                     | from IM and HB  | Low intensity                 |
| IAP  | 2016/11/24 | 117.1                                   | 1.35                                   | 458.7                    | Low                     | from IM and HB  | Local                         |
| IAP  | 2016/11/26 | 209.4                                   | 1.43                                   | 227.4                    | High                    | from IM and HB  | Regional                      |
| IAP  | 2016/12/1  | 49.4                                    | 0.82                                   | 192.3                    | High                    | from IM and HB  | Regional                      |
| IAP  | 2016/12/2  | 98.6                                    | 1.51                                   | 515.4                    | High                    | from IM and HB  | Regional + local              |
| IAP  | 2016/12/3  | 239.9                                   | 1.94                                   | 634.8                    | Low                     | from HB and SX  | local                         |
| IAP  | 2016/12/4  | 128.6                                   | 1.02                                   | 321.7                    | Low                     | from IM and HB  | local                         |
| PG   | 2016/11/22 | 16.8                                    | 0.85                                   | 216.6                    | Low                     | from IM and HB  | Local                         |
| PG   | 2016/11/24 | 106.8                                   | 2.52                                   | 915.6                    | Low                     | from IM and HB  | Local                         |
| PG   | 2016/11/26 | 239.6                                   | 4.34                                   | 913.7                    | High                    | from IM and HB  | Regional + local              |
| PG   | 2016/12/1  | 41.0                                    | 1.22                                   | 311.2                    | High                    | from IM and HB  | Regional                      |
| PG   | 2016/12/2  | 138.2                                   | 1.34                                   | 780.0                    | High                    | from IM and HB  | Regional + local              |
| PG   | 2016/12/3  | 281.5                                   | 2.62                                   | 1406.3                   | Low                     | from HB and SX  | Strong local                  |
| PG   | 2016/12/4  | 294.3                                   | 2.70                                   | 1796.1                   | Low                     | from IM and HB  | Strong local                  |
| IAP  | 2017/5/24  | 12.2                                    | 0.55                                   | 13.0                     | High                    | from IM, LN, HB | Regional                      |
| IAP  | 2017/5/26  | 34.7                                    | 0.44                                   | 22.1                     | High                    | from IM, HB     | Regional                      |
| IAP  | 2017/5/27  | 78.8                                    | 0.49                                   | 20.1                     | High                    | from IM, HB     | Regional                      |
| IAP  | 2017/6/10  | 18.6                                    | 0.46                                   | 11.6                     | Low                     | from IM, LN, HB | Low intensity                 |
| IAP  | 2017/6/16  | 44.3                                    | 0.40                                   | 51.9                     | High                    | from SD, HB     | Regional + local              |
| IAP  | 2017/6/17  | 66.7                                    | 0.77                                   | 179.6                    | High                    | from SX, HB     | Regional + local              |
| PG   | 2017/5/26  | 37.4                                    | 0.58                                   | 56.4                     | High                    | from SD, HB     | Regional                      |
| PG   | 2017/5/27  | 70.3                                    | 0.85                                   | 89.8                     | High                    | from IM, HB     | Regional + local              |
| PG   | 2017/6/10  | 11.6                                    | 0.65                                   | 56.9                     | Low                     | from HB, TJ     | Local                         |
| PG   | 2017/6/16  | 47.4                                    | 0.72                                   | 107.1                    | Very high               | from HB         | Regional + local              |
| PG   | 2017/6/17  | 46.7                                    | 0.96                                   | 219.8                    | Very high               | from IM, SX, HB | Regional + local              |

IM: Inner Mongolia, HB: Hebei, SD: Shandong, SX: Shanxi, TJ: Tianjin



157 **Table S3.** Summary of EC/OC and OC/LG ratios of different biomass types and the ranges of  
158 fractions in LG.

| No. | Sample                      | EC/OC | OC/LG | Reference              |
|-----|-----------------------------|-------|-------|------------------------|
| 1   | Slash pine                  | 0.141 | 0.341 | Fine et al., 2002      |
| 2   | Ponderosa pine              | 0.014 | 7.83  | Fine et al., 2001      |
| 3   | Western hemlock             | 0.050 | 2.52  | Hays et al., 2002      |
| 4   | Loblolly pine               | 0.178 | 1.02  | Fine et al., 2002      |
| 5   | Douglas fir                 | 0.098 | 2.45  | Fine et al., 2004      |
| 6   | Eastern hemlock             | 0.053 | 10.5  | Fine et al., 2001      |
| 7   | White pine needle           | 0.078 | 7.18  | Mazzoleni et al., 2007 |
| 8   | Larch                       | 0.176 | 3.68  | Schmidl et al., 2008b  |
| 9   | Balsam fir                  | 0.066 | 12.3  | Fine et al., 2001      |
| 10  | Douglas fir (catalyst)      | 0.338 | 2.52  | Fine et al., 2004      |
| 11  | Loblolly pine               | 0.307 | 3.95  | Fine et al., 2004      |
| 12  | Chestnut oak                | 0.312 | 3.94  | Wang et al., 2009      |
| 13  | White pine needle           | 0.282 | 4.71  | Mazzoleni et al., 2007 |
| 14  | White pine needle           | 0.242 | 6.61  | Mazzoleni et al., 2007 |
| 15  | Spruce                      | 0.384 | 5.02  | Schmidl et al., 2008b  |
| 16  | Mixed wood                  | 0.288 | 6.76  | Mazzoleni et al., 2007 |
| 17  | White pine needle           | 0.331 | 6.64  | Mazzoleni et al., 2007 |
| 18  | Chinese evergreen Chinkapin | 0.078 | 33.8  | Wang et al., 2009      |
| 19  | Chinese red pine            | 0.375 | 8.33  | Sang-Arlt et al., 2020 |
| 20  | Cape jasmine                | 0.137 | 27.9  | Wang et al., 2009      |
| 21  | Ponderosa pine needles      | 0.401 | 10.2  | Mazzoleni et al., 2007 |
| 22  | Common aporosa              | 0.095 | 43.3  | Wang et al., 2009      |
| 23  | Samak                       | 0.054 | 137   | Wang et al., 2009      |
| 24  | Cedar wood                  | 0.090 | 96.9  | Mazzoleni et al., 2007 |
| 25  | Excelsior                   | 1.080 | 5.87  | Mazzoleni et al., 2007 |
| 26  | Excelsior                   | 1.090 | 6.13  | Mazzoleni et al., 2007 |
| 27  | Eastern white pine          | 0.426 | 19.1  | Fine et al., 2001      |
| 28  | Maritime pine               | 1.420 | 6.87  | Goncalves et al., 2010 |
| 29  | China fir                   | 0.651 | 16.7  | Sang-Arlt et al., 2020 |
| 30  | Ponderosa pine needles      | 1.320 | 15.4  | Mazzoleni et al., 2007 |
| 31  | Cedar wood                  | 0.264 | 94.4  | Mazzoleni et al., 2007 |
| 32  | Ponderosa pine needles      | 1.500 | 17.4  | Mazzoleni et al., 2007 |
| 33  | Wood                        | 0.500 | 55.6  | Schmidl et al., 2008a  |
| 34  | Ponderosa pine needles      | 0.632 | 55.4  | Mazzoleni et al., 2007 |
| 35  | Tamarak pine wood           | 0.330 | 137   | Mazzoleni et al., 2007 |
| 36  | Ponderosa pine sticks       | 3.320 | 20.1  | Mazzoleni et al., 2007 |
| 37  | Ponderosa pine sticks       | 3.680 | 25.6  | Mazzoleni et al., 2007 |
| 38  | Wood branch charcoal        | 0.393 | 625   | Sun et al., 2019       |
| 39  | Spruce with green needles   | 0.401 | 2128  | Schmidl et al., 2008b  |

| 40  | Pine                    | 0.508 | 2128  | Schauer et al., 2001    |
|-----|-------------------------|-------|-------|-------------------------|
| 41  | Pine with green needles | 0.600 | 3571  | Schauer et al., 2001    |
| No. | Sample                  | EC/OC | OC/LG | Reference               |
| 42  | Wheat straw             | 0.223 | 4.07  | Sun et al., 2019        |
| 43  | Wheat straw             | 0.068 | 15.4  | Fushimi et al., 2017    |
| 44  | Wheat straw             | 0.083 | 15.2  | Fushimi et al., 2017    |
| 45  | Wheat straw             | 0.184 | 12.5  | Dhammapala et al., 2007 |
| 46  | Wheat straw             | 0.422 | 10    | Hays et al., 2005       |
| 47  | Wheat straw             | 0.510 | 9.09  | Mazzoleni et al., 2007  |
| 48  | Maize straw             | 0.257 | 3.18  | Sun et al., 2019        |
| 49  | Maize straw             | 0.106 | 55.6  | Yan et al., 2018        |
| 50  | Cereal straw            | 0.130 | 12    | Zhang et al., 2007      |

160 **Table S4.** The estimated  $OC/EC_{nf, min}$  and  $OC/EC_{f, min}$  ratios for IAP and PG sites during the whole  
161 winter and summer sampling period

|            | lowest 5<br>%<br>OC/EC | lowest 2<br>$\frac{f_{NF,OC}}{f_{NF,EC}}$ | lowest 2<br>$\left(\frac{1-f_{NF,OC}}{1-f_{NF,EC}}\right)$ | Estimated<br>$OC/EC_{nf, min}$ | Estimated<br>$OC/EC_{f, min}$ |
|------------|------------------------|-------------------------------------------|------------------------------------------------------------|--------------------------------|-------------------------------|
| IAP winter | 4.35                   | 0.70                                      | 0.96                                                       | 3.06                           | 4.16                          |
| PG winter  | 6.27                   | 0.76                                      | 0.81                                                       | 4.76                           | 5.09                          |
| IAP summer | 4.65                   | 0.73                                      | 0.78                                                       | 3.41                           | 3.62                          |
| PG summer  | 4.45                   | 0.88                                      | 0.62                                                       | 3.92                           | 2.76                          |

162  $f_{NF, OC}$  and  $f_{NF, EC}$  are the non-fossil fractions of OC and EC,  $(1 - f_{NF, OC})$  and  $(1 - f_{NF, EC})$  are the fossil  
163 fractions of OC and EC.  
164

165 **Table S5.** Correlations and slopes among WINSOC, WSOC, POC, SOC, OC<sub>bb</sub> and OC<sub>ck</sub> at IAP  
166 and PG in winter and summer.

| x                 | y                    | IAP winter |                | PG winter |                | IAP summer |                | PG summer |                |
|-------------------|----------------------|------------|----------------|-----------|----------------|------------|----------------|-----------|----------------|
|                   |                      | slope      | R <sup>2</sup> | slope     | R <sup>2</sup> | slope      | R <sup>2</sup> | slope     | R <sup>2</sup> |
| POC <sub>f</sub>  | WINSOC <sub>f</sub>  | 1.11       | 0.97           | 1.23      | 0.97           | 0.92       | 0.93           | 0.84      | 0.82           |
|                   | WSOC <sub>f</sub>    | 0.57       | 0.99           | 0.61      | 0.84           | 0.96       | 0.92           | 0.58      | 0.55           |
| SOC <sub>f</sub>  | WINSOC <sub>f</sub>  | 1.53       | 0.96           | 1.27      | 0.89           | 0.99       | 0.91           | 0.98      | 0.45           |
|                   | WSOC <sub>f</sub>    | 0.78       | 0.93           | 0.69      | 0.96           | 1.05       | 0.93           | 0.89      | 0.67           |
| OC <sub>bb</sub>  | WINSOC <sub>nf</sub> | 1.59       | 1.00           | 2.38      | 0.94           | 1.16       | 0.44           | 1.58      | 0.91           |
|                   | WSOC <sub>nf</sub>   | 1.64       | 0.94           | 1.70      | 0.92           | 3.41       | 0.93           | 1.54      | 0.93           |
| OC <sub>ck</sub>  | WINSOC <sub>nf</sub> | 3.54       | 0.88           | 1.68      | 0.69           | 1.08       | 0.74           | 2.26      | 0.27           |
|                   | WSOC <sub>nf</sub>   | 3.83       | 0.94           | 1.21      | 0.69           | 1.53       | 0.19           | 2.29      | 0.32           |
| SOC <sub>nf</sub> | WINSOC <sub>nf</sub> | 0.85       | 0.98           | 0.98      | 0.83           | 0.42       | 0.65           | 0.79      | 0.92           |
|                   | WSOC <sub>nf</sub>   | 0.90       | 0.99           | 0.71      | 0.83           | 1.09       | 0.97           | 0.75      | 0.88           |

167 f: fossil sources, nf: non-fossil sources, bb: biomass burning, ck: cooking. Concentrations of fossil  
168 and non-fossil sources of WINSOC and WSOC were from <sup>14</sup>C measurement. POC, SOC, OC<sub>bb</sub> and  
169 OC<sub>ck</sub> are from extended Gelencsér method.

170

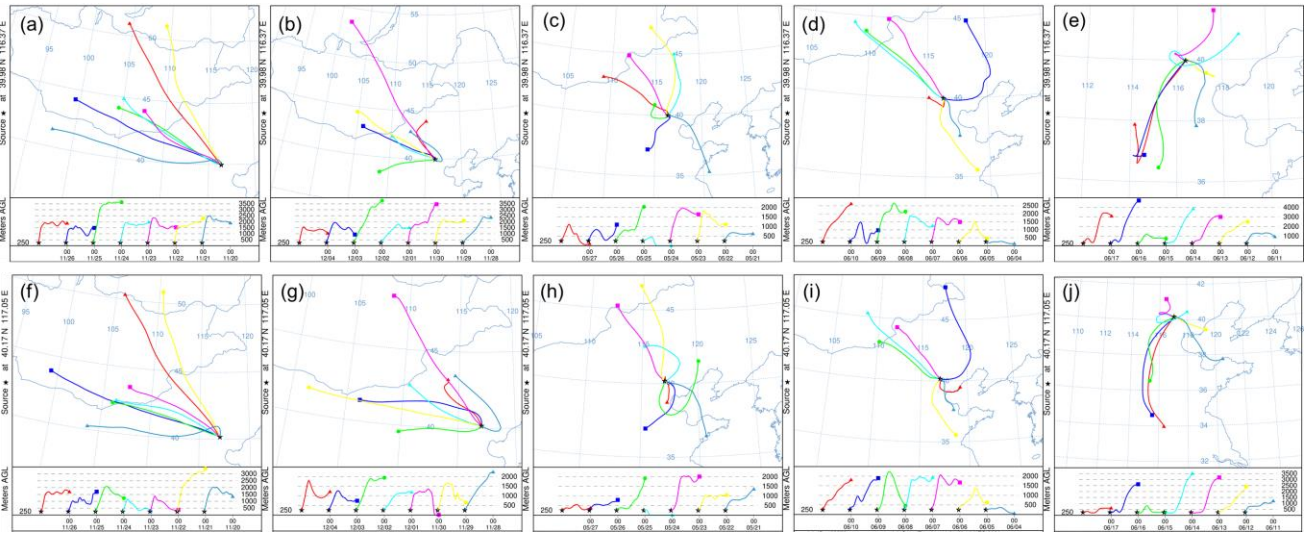

**Figure S1.** 48 h air-mass back trajectories with 24 h interval at 250 m, (a)-(e): destination at IAP, (f)-(j): destination at PG. (<https://ready.arl.noaa.gov/HYSPLIT.php>, last access: 12 June 2020)

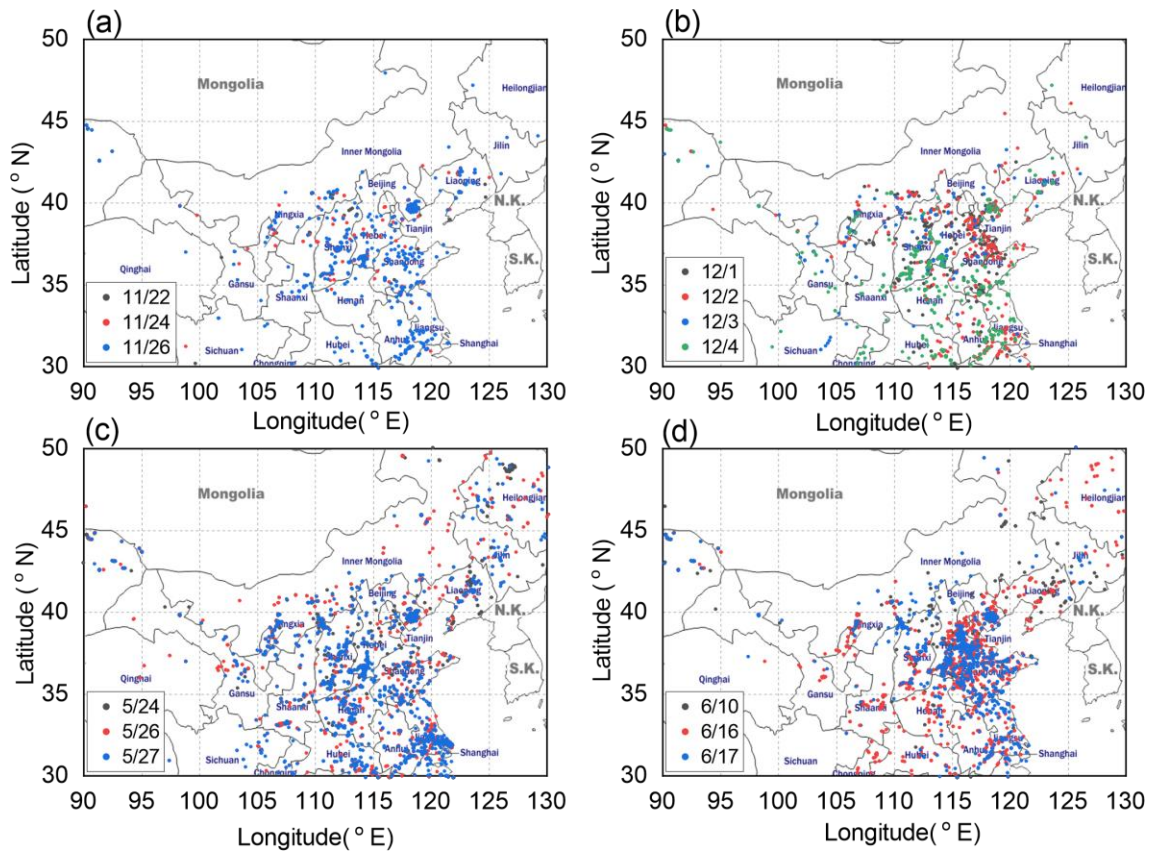

**Figure S2.** Fire spots observed by MODIS (AQUA/TERRA) (<https://firms.modaps.eosdis.nasa.gov/alerts/>, last access: 16 April 2020) around Beijing, coloured dots refer to fire spots on (a): 22, 24, 26 Nov 2016, (b): 1-4 Dec 2016, (c): 24, 26, 27 May 2017, (d) 10, 16, 17 Jun 2017.

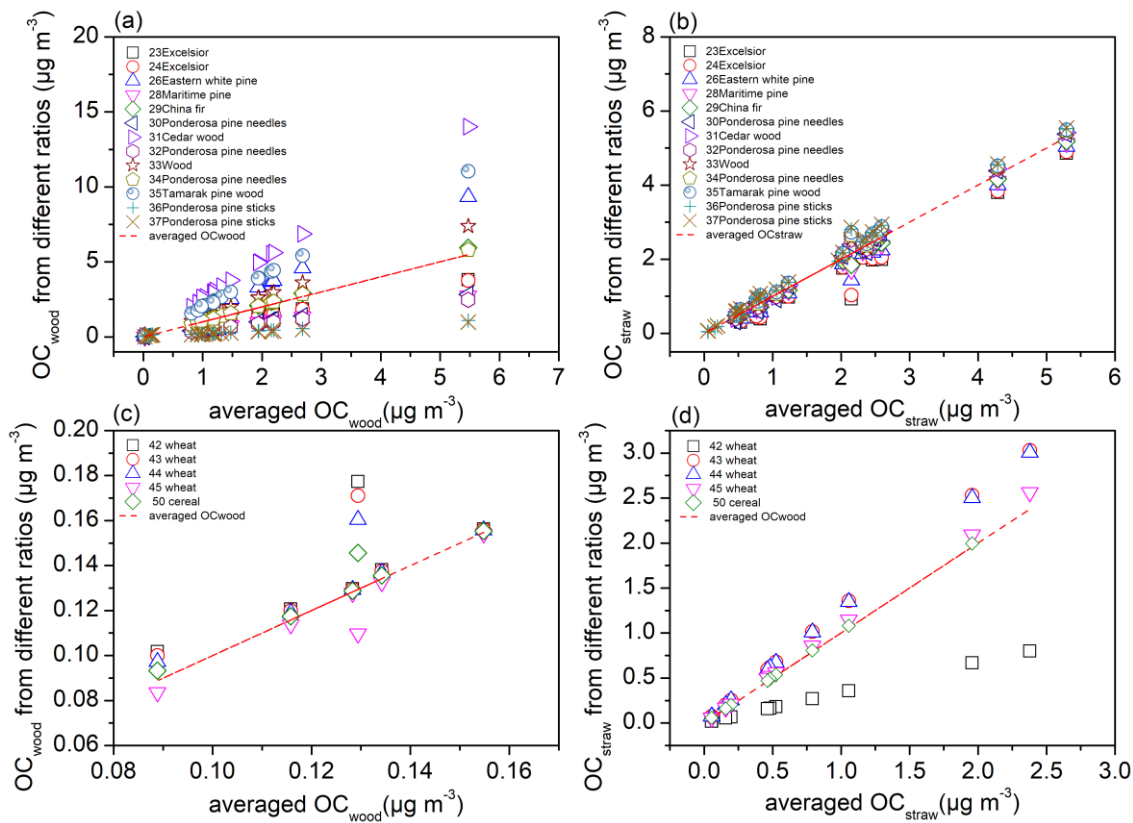

**Figure S3.** Correlations of averaged  $OC_{wood}$  with  $OC_{wood}$  from different ratios and averaged  $OC_{straw}$  with  $OC_{straw}$  from different ratios. (a), the influence of ratios from softwood on the estimation of  $OC_{wood}$ ; (b), the influence of ratios from softwood on the estimation of  $OC_{straw}$ ; (c), the influence of ratios from wheat straws on the estimation of  $OC_{wood}$ ; (d), the influence of ratios from wheat straws on the estimation of  $OC_{straw}$ . As there is only one set of ratios from maize straw which matches the selection limitation, the influence of ratios from maize straw was not plotted. The legends correspond to the No. and types of samples in Table S3.

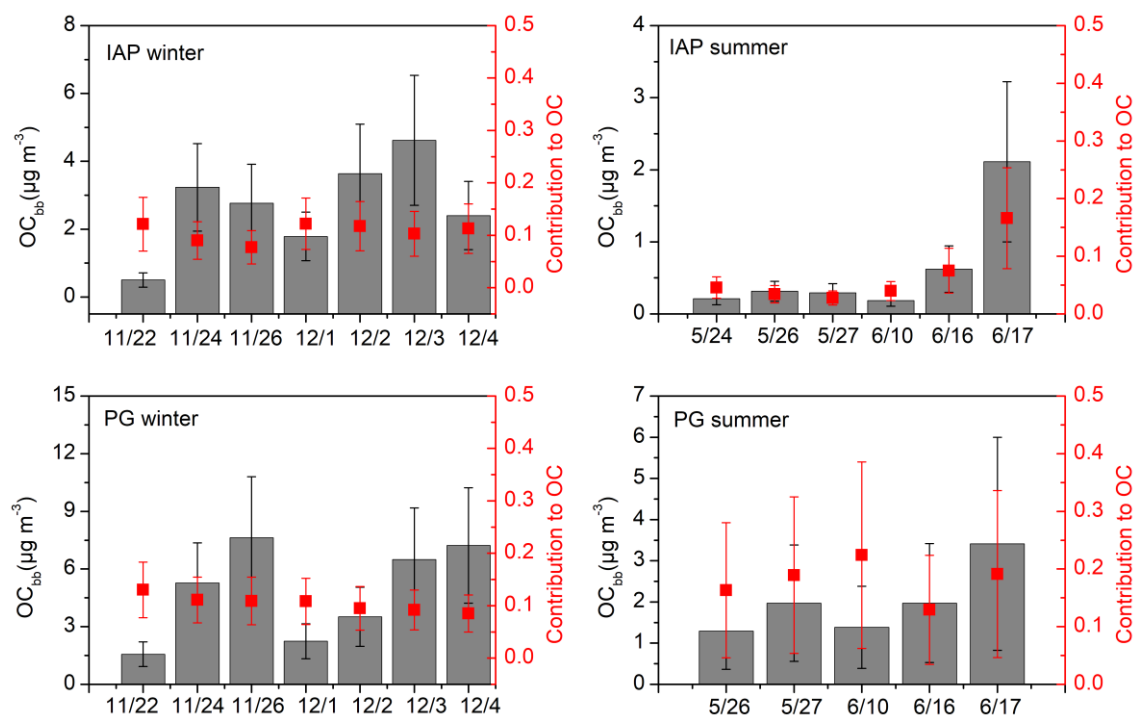

**Figure S4.** The mass concentrations and % contributions of  $OC_{bb}$  at IAP and PG during winter and summer.



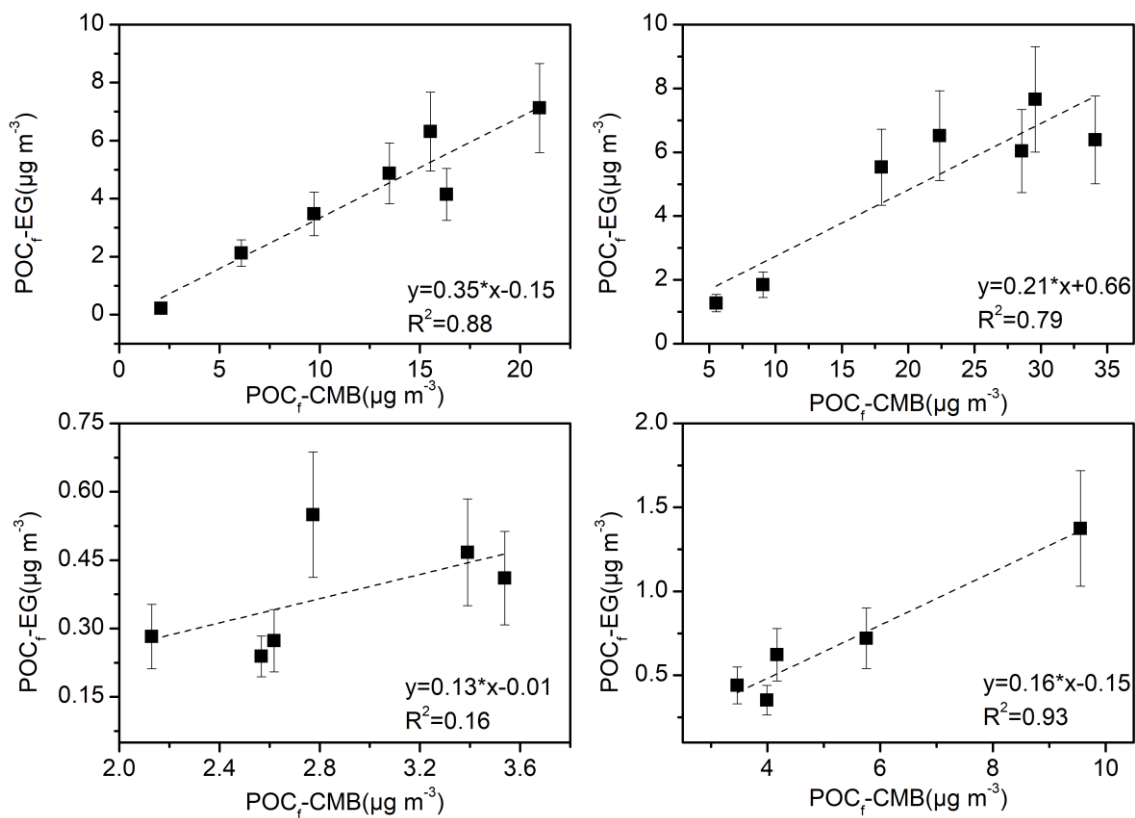

**Figure S5.** Correlations of  $\text{POC}_f$  from the extended Gelencsér method ( $\text{POC}_f\text{-EG}$ ) and CMB if using  $(\text{POC}/\text{EC})_f$  ratios 1.12–2.08 in winter, 0.40–0.77 in summer.

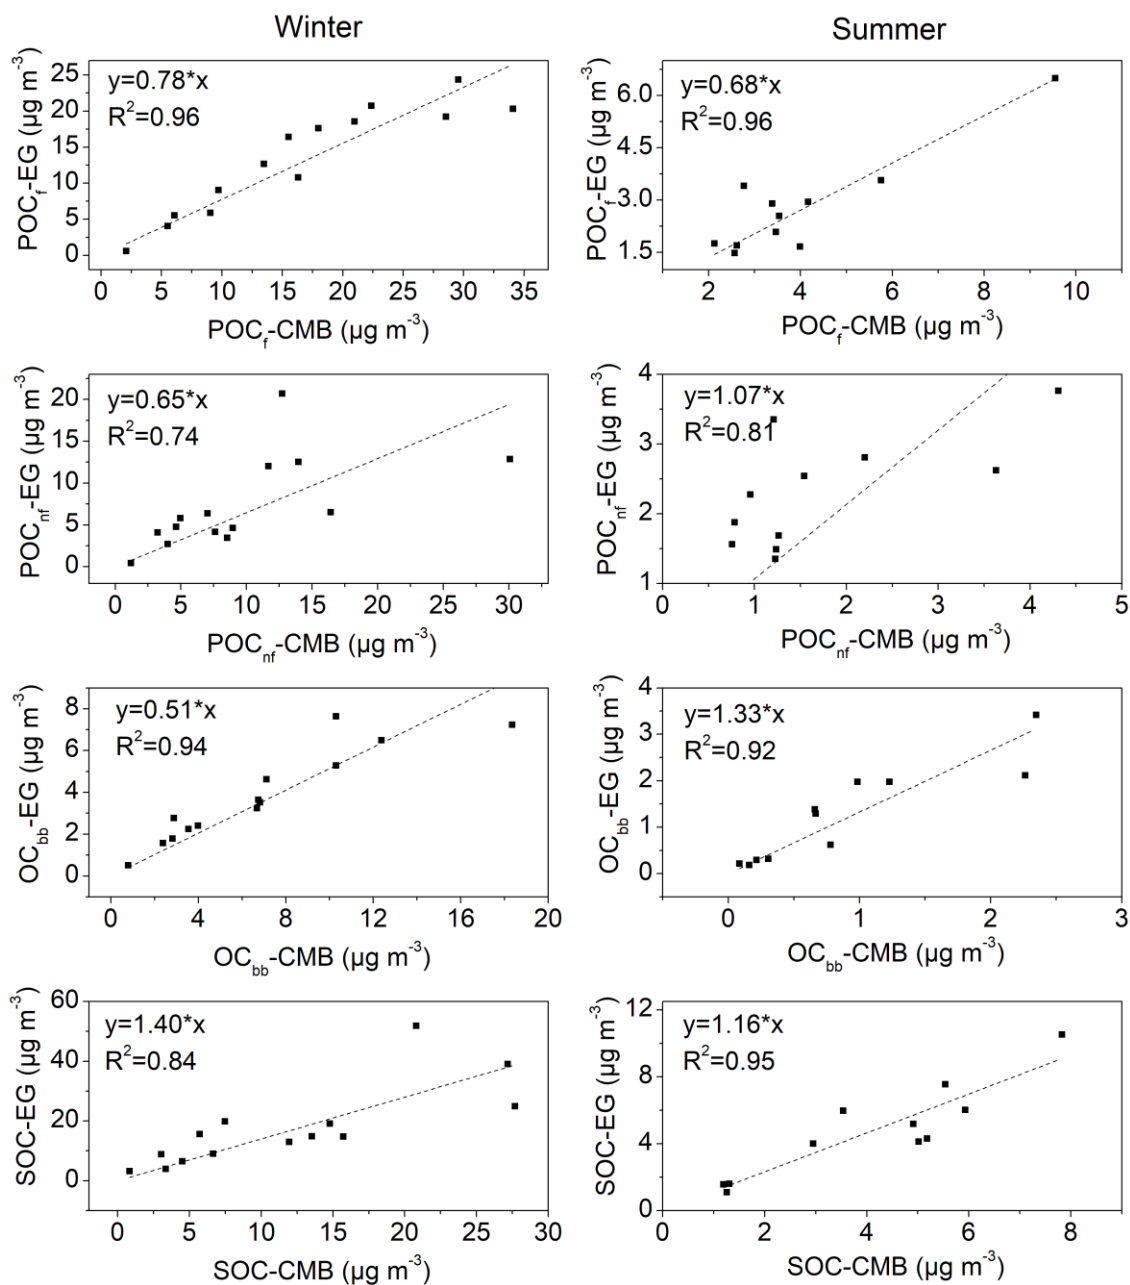

**Figure S6.** Correlations of OC sources from extended Gelencsér method with those from CMB model in winter (left) and summer (right). EG denotes extended Gelencsér method.

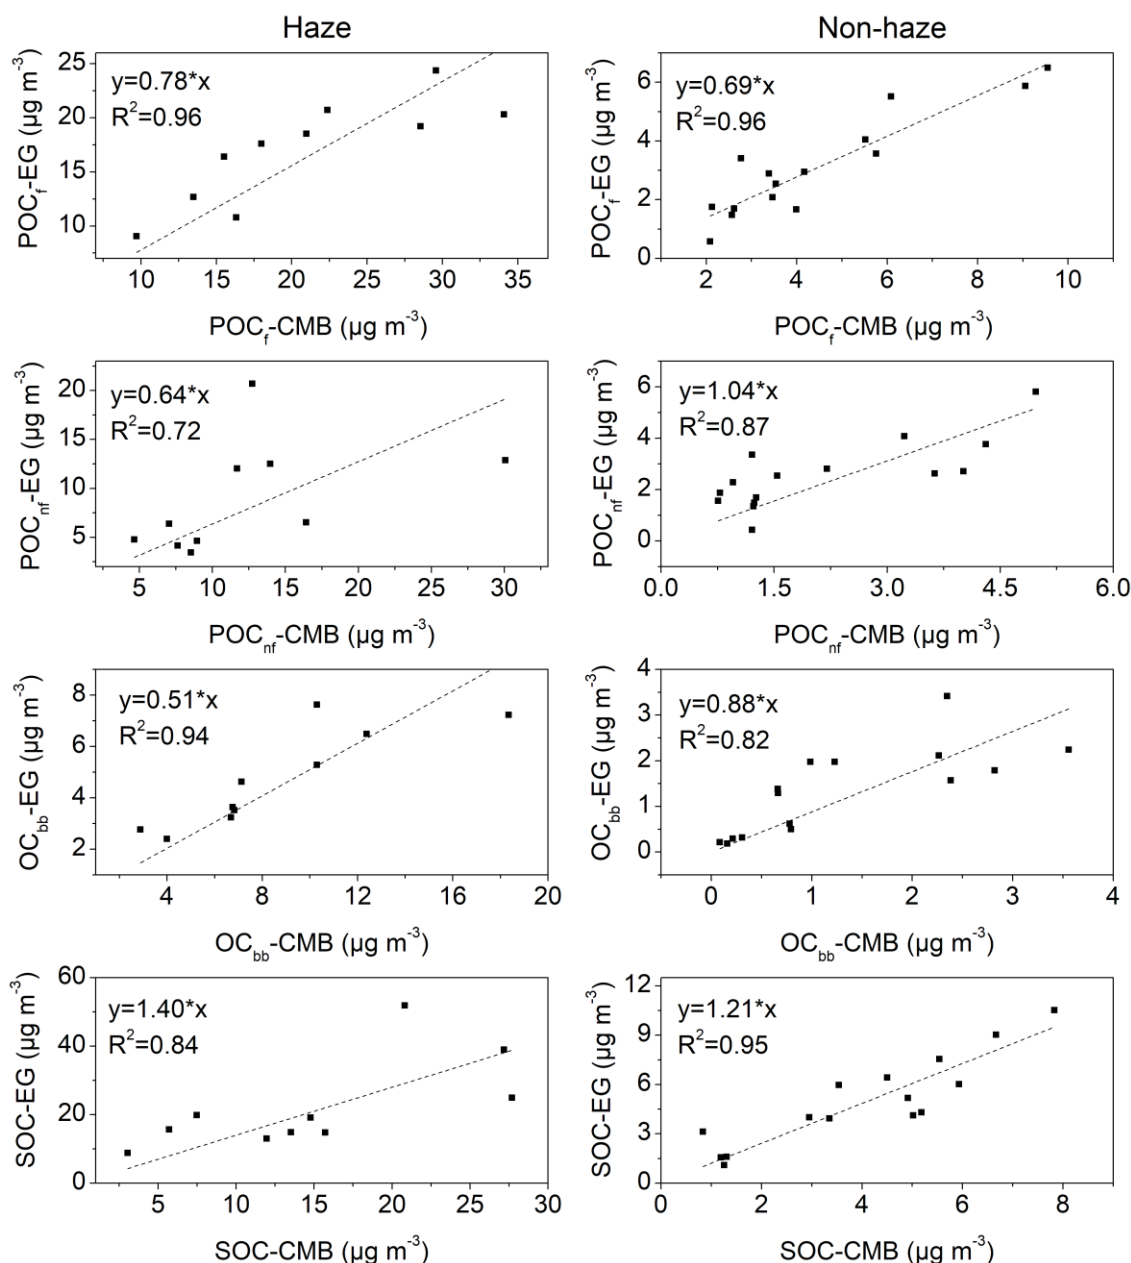

**Figure S7.** Correlations of OC sources from extended Gelencsér method with those from CMB model during haze period (left) and non-haze period (right). EG denotes extended Gelencsér method.
